# Supplementary material for: Highly dispersed Pt nanoparticles on 2D MoS2 nanosheets for efficient and stable hydrogen evolution reaction
Source: Royal Society of Chemistry journal article supplement (doi:10.1039/d1ta10725a), 2022-01-01
Supplement: d1ta10725a1.pdf [file d1ta10725a1.pdf]

## **Supplementary Information**

### **Highly Dispersed Pt Nanoparticles on 2D MoS<sub>2</sub> Nanosheets for Efficient and Stable Hydrogen Evolution Reaction**

Yaru Li, Shuaiqi Wang, Youdi Hu, Xiaoze Zhou, Meng Zhang, Xiaoyu Jia, Yi Yang,  
Bo-Lin Lin and Gang Chen\*

School of Physical Science and Technology, ShanghaiTech University, Shanghai  
201210, China

\*E-mail: [gchen@shanghaitech.edu.cn](mailto:gchen@shanghaitech.edu.cn)

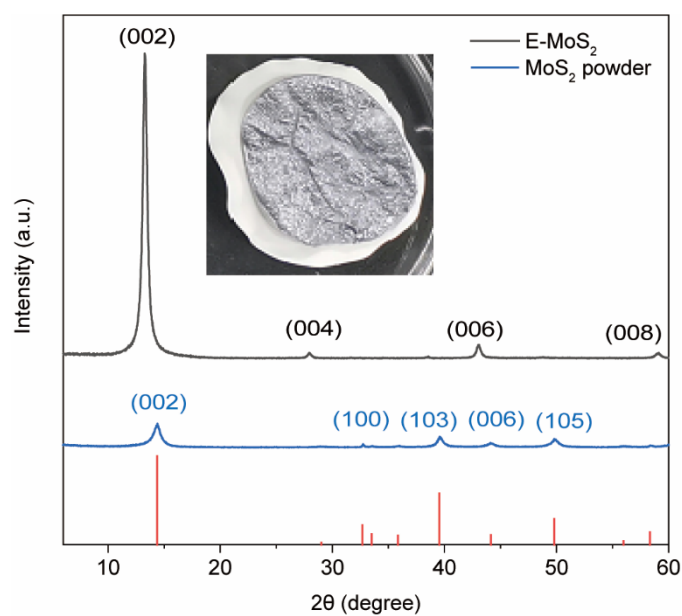

**Fig. S1** XRD pattern of the E-MoS<sub>2</sub> film obtained by vacuum filtration and the MoS<sub>2</sub> powder. Inset: the digital picture of the E-MoS<sub>2</sub> film.

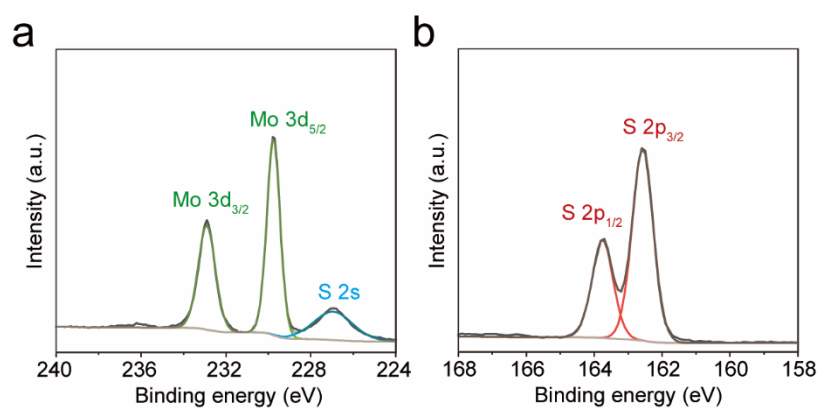

**Fig. S2** (a) XPS spectra of Mo 3d and S 2s for E-MoS<sub>2</sub>. (b) XPS spectra of S 3p for E-MoS<sub>2</sub>.

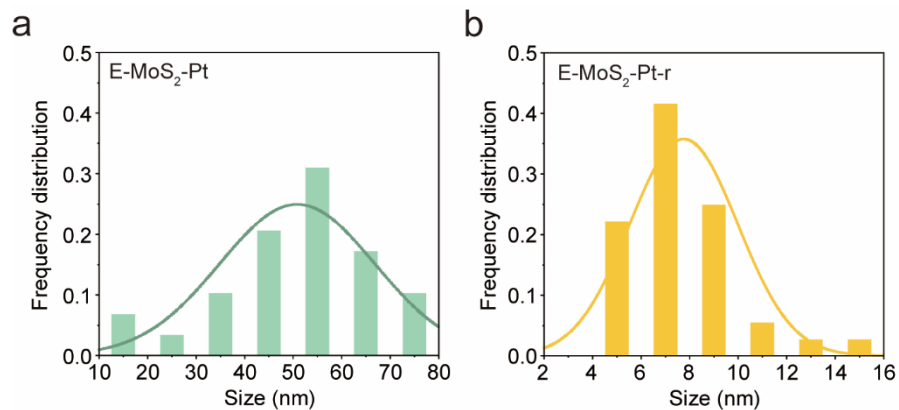

**Fig. S3** (a) The size distribution of the Pt NPs on E-MoS<sub>2</sub>-Pt. (b) The size distribution of the Pt NPs on E-MoS<sub>2</sub>-Pt-r.

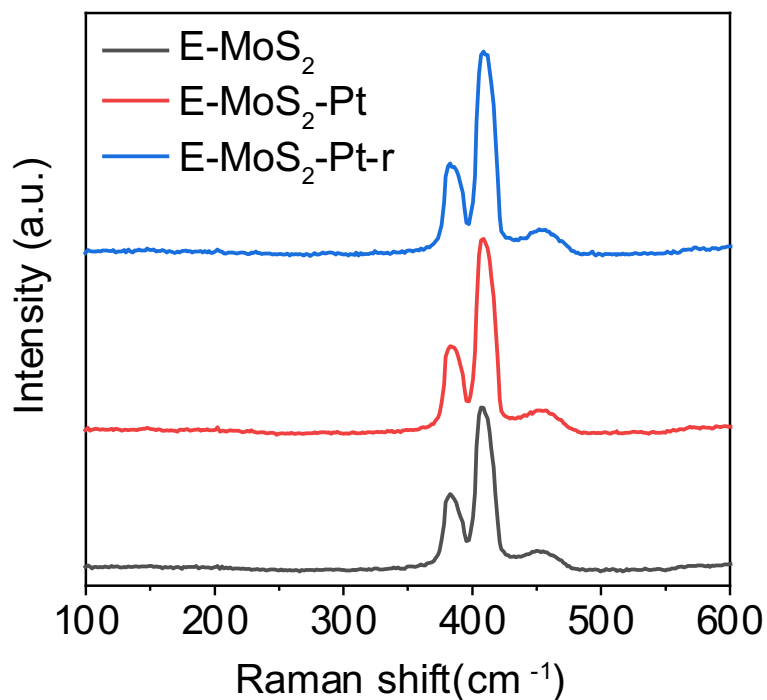

**Fig. S4** Raman spectra of E-MoS<sub>2</sub>, E-MoS<sub>2</sub>-Pt and E-MoS<sub>2</sub>-Pt-r.

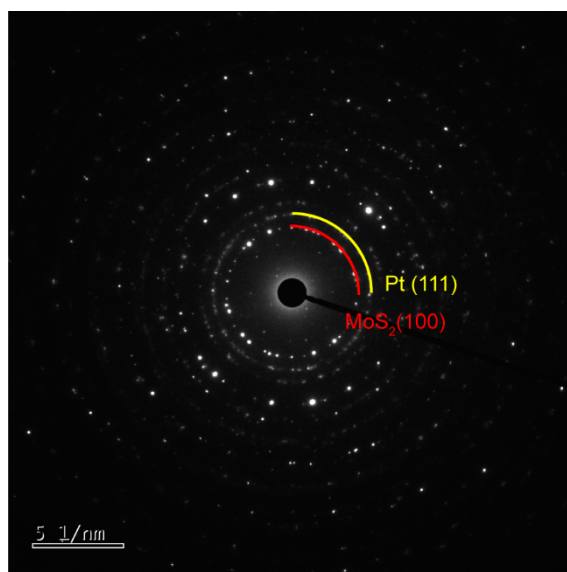

**Fig. S5** The selected area electron diffraction (SAED) pattern of E-MoS<sub>2</sub>-Pt. The marked red diffraction ring corresponds to the lattice spacing of  $d = 0.27$  nm for MoS<sub>2</sub> (100) and the yellow ring corresponds to  $d = 0.22$  nm for Pt (111).

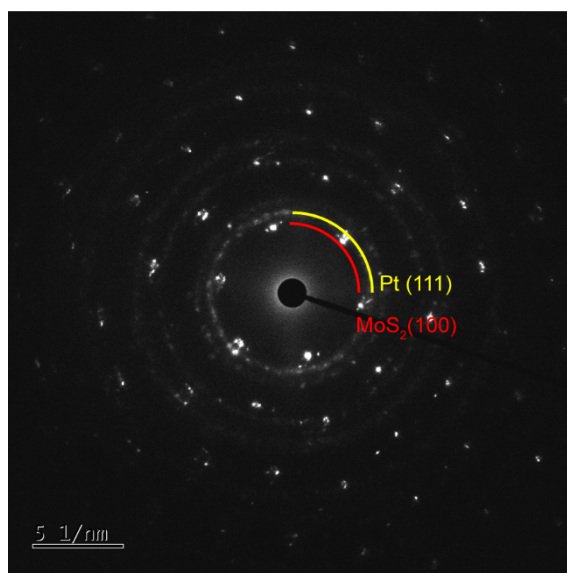

**Fig. S6** The SAED pattern of E-MoS<sub>2</sub>-Pt-r. The marked red diffraction ring corresponds to the lattice spacing of  $d = 0.27$  nm for MoS<sub>2</sub> (100) and the yellow ring corresponds to  $d = 0.22$  nm for Pt (111).

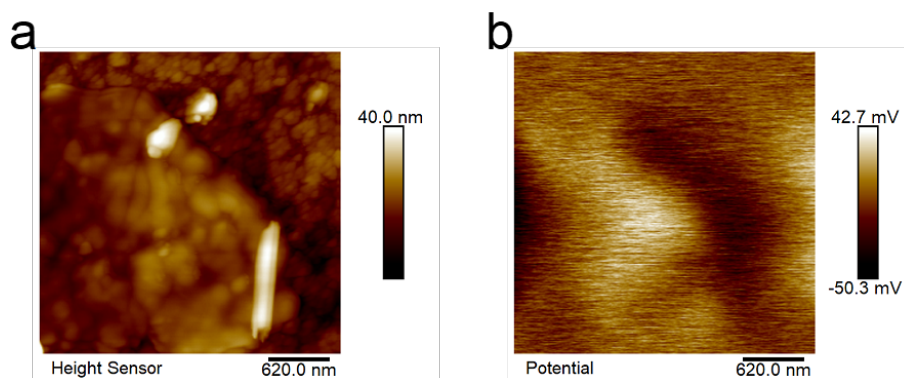

**Fig. S7** (a) Atomic force microscope (AFM) image of the E-MoS<sub>2</sub> nanosheet. (b) The corresponding Kelvin probe force microscopy (KPFM) image of the E-MoS<sub>2</sub> nanosheet.

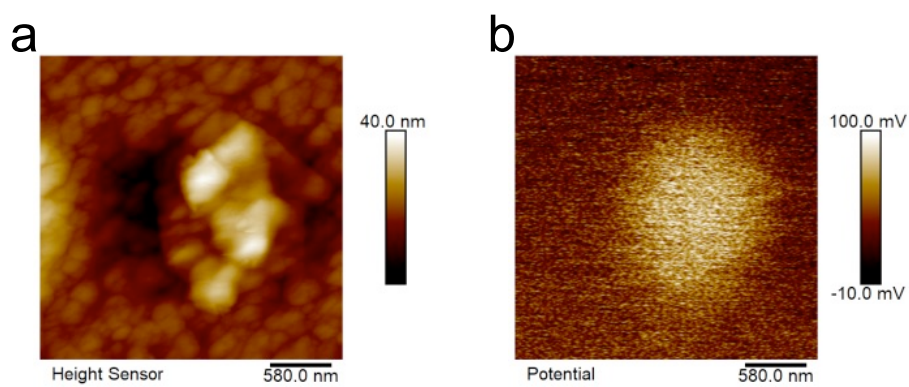

**Fig. S8** (a) AFM image of E-MoS<sub>2</sub>-Pt nanosheets. (b) The corresponding KPFM image of the E-MoS<sub>2</sub>-Pt nanosheet.

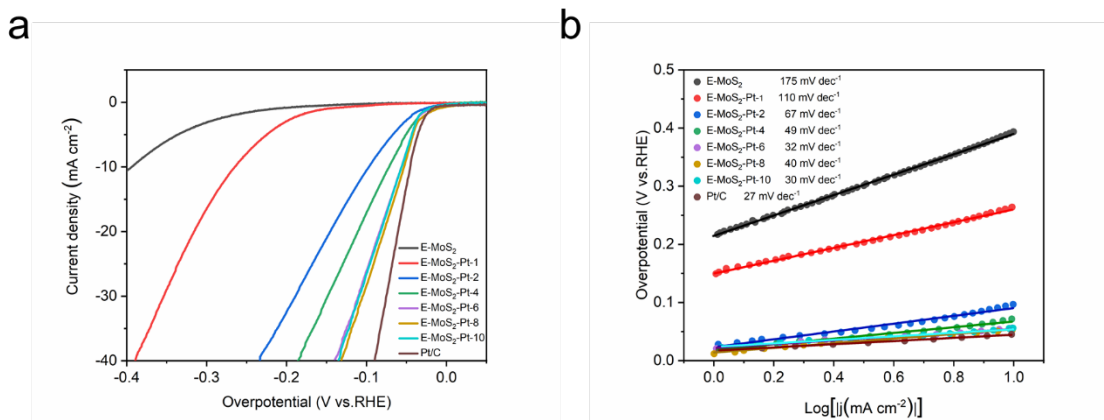

**Fig. S9** (a) The polarization curves of E-MoS<sub>2</sub>, the commercial Pt/C (20 wt%) and E-MoS<sub>2</sub>-Pt for the Pt mass ratios of 0.01 (E-MoS<sub>2</sub>-Pt-1), 0.02 (E-MoS<sub>2</sub>-Pt-2), 0.04 (E-MoS<sub>2</sub>-Pt-4), 0.06 (E-MoS<sub>2</sub>-Pt-6), 0.08 (E-MoS<sub>2</sub>-Pt-8) and 0.1 (E-MoS<sub>2</sub>-Pt-10) in the 0.5 M H<sub>2</sub>SO<sub>4</sub> solution. (b) The corresponding Tafel pots derived from (a).

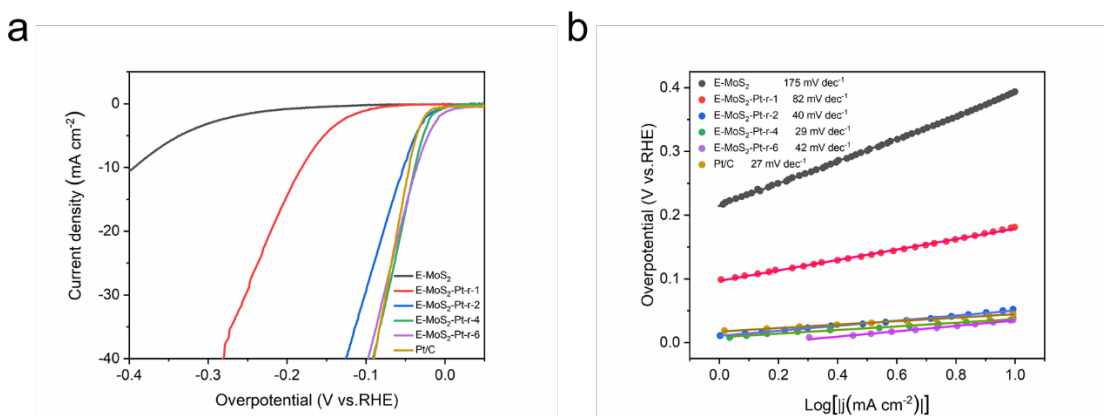

**Fig. S10** (a) The polarization curves of E-MoS<sub>2</sub>, the commercial Pt/C (20 wt%) and E-MoS<sub>2</sub>-Pt-r for the Pt mass ratios of 0.01 (E-MoS<sub>2</sub>-Pt-r-1), 0.02 (E-MoS<sub>2</sub>-Pt-r-2), 0.04 (E-MoS<sub>2</sub>-Pt-r-4) and 0.06 (E-MoS<sub>2</sub>-Pt-r-6) in the 0.5 M H<sub>2</sub>SO<sub>4</sub> solution. (b) The corresponding Tafel plots derived from (a).

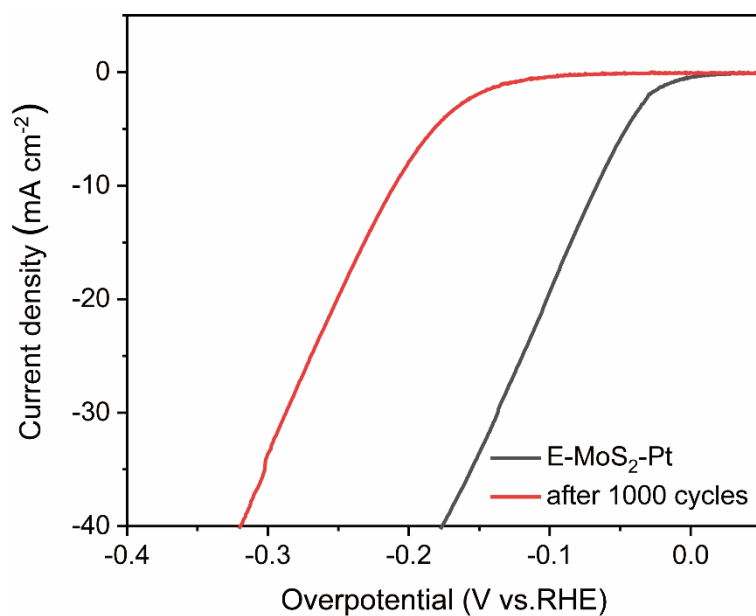

**Fig. S11** The polarization curves of E-MoS<sub>2</sub>-Pt taken initially and after 1000 cycles (from -0.1 V to -0.3 V vs. RHE).

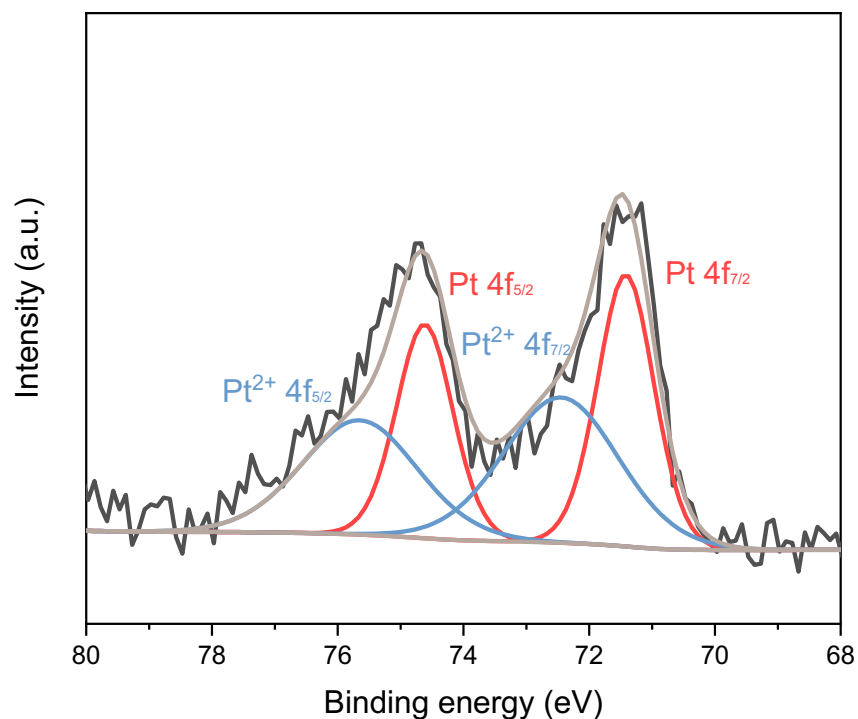

**Fig. S12** XPS analysis of the binding energy of Pt in E-MoS<sub>2</sub>-Pt taken after 1000 cycles (from -0.1 V to -0.3 V vs. RHE).

**Table S1.** Electrochemical impedance parameters obtained by fitting the Nyquist plots to the equivalent circuit model in Fig. 4c.

| Sample                   | $R_s/\Omega$ | $R_{ct}/\Omega$ | CPE-T   | CPE-P   |
|--------------------------|--------------|-----------------|---------|---------|
| E-MoS <sub>2</sub>       | 9.829        | 25712           | 0.00018 | 0.669   |
| E-MoS <sub>2</sub> -Pt   | 7.116        | 98.44           | 0.00111 | 0.79506 |
| E-MoS <sub>2</sub> -Pt-r | 7.105        | 12.67           | 0.0229  | 0.44486 |
| Pt/C                     | 7.009        | 6.682           | 0.02489 | 0.6519  |

**Table S2.** Comparisons of the HER performance of E-MoS<sub>2</sub>-Pt-r with other related catalysts.

| Catalyst                                            | $\eta$ / mV @ 10 mA cm <sup>-2</sup> | Tafel / mV dec <sup>-1</sup> | Reference |
|-----------------------------------------------------|--------------------------------------|------------------------------|-----------|
| Pt-MoS <sub>2</sub>                                 | ~140                                 | 96                           | 1         |
| Mo <sub>2</sub> TiC <sub>2</sub> T <sub>x</sub> -Pt | 30                                   | 30                           | 2         |
| 10%Pd-MoS <sub>2</sub>                              | 72                                   | 63                           | 3         |
| Pt-1T <sup>S</sup> -MoS <sub>2</sub>                | 223                                  | 57                           | 4         |
| Pt-1T <sup>r</sup> -MoS <sub>2</sub>                | 180                                  | 88                           | 5         |
| O-MoS <sub>2</sub> @Pt                              | 144                                  | 68                           | 6         |
| Pt-SAs/MoS <sub>2</sub>                             | 59                                   | 31                           | 7         |
| Pt/np-Co <sub>0.85</sub> Se                         | 55                                   | 35                           | 8         |
| Pt@PCM                                              | 105                                  | 64                           | 9         |
| SV-MoS <sub>2</sub>                                 | 170                                  | 60                           | 10        |
| MoN-NC                                              | 62                                   | 54                           | 11        |
| MoS <sub>2</sub> /graphene                          | 137                                  | 49                           | 12        |
| Co (10.4)/Se-MoS <sub>2</sub> -NF                   | 104                                  | 67                           | 13        |
| E-MoS <sub>2</sub> -Pt-r                            | <b>38</b>                            | <b>29</b>                    | this work |



## Reference

- 1 J. Deng, H. Li, J. Xiao, Y. Tu, D. Deng, H. Yang, H. Tian, J. Li, P. Ren and X. Bao, *Energy Environ. Sci.*, 2015, **8**, 1594-1601.
- 2 J. Zhang, Y. Zhao, X. Guo, C. Chen, C.-L. Dong, R.-S. Liu, C.-P. Han, Y. Li, Y. Gogotsi and G. Wang, *Nat. Catal.*, 2018, **1**, 985-992.
- 3 Z. Luo, Y. Ouyang, H. Zhang, M. Xiao, J. Ge, Z. Jiang, J. Wang, D. Tang, X. Cao, C. Liu and W. Xing, *Nat. Commun.*, 2018, **9**, 2120.
- 4 T. H. M. Lau, S. Wu, R. Kato, T.-S. Wu, J. Kulhavy, J. Mo, J. Zheng, J. S. Foord, Y.-L. Soo, K. Suenaga, M. T. Darby and S. C. E. Tsang, *ACS Catal.*, 2019, **9**, 7527-7534.
- 5 C. Wu, D. Li, S. Ding, Z. U. Rehman, Q. Liu, S. Chen, B. Zhang and L. Song, *J. Phys. Chem. Lett.*, 2019, **10**, 6081-6087.
- 6 F. Gong, S. Ye, M. Liu, J. Zhang, L. Gong, G. Zeng, E. Meng, P. Su, K. Xie, Y. Zhang and J. Liu, *Nano Energy*, 2020, **78**, 105284.
- 7 S. Qi, J. He, J. Liu, H. Wang, M. Wu, F. Li, D. Wu, X. Li and J. Ma, *Nat. Commun.*, 2020, **31**, 4558.
- 8 K. Jiang, B. Liu, M. Luo, S. Ning, M. Peng, Y. Zhao, Y. R. Lu, T. S. Chan, F. M. F. de Groot and Y. Tan, *Nat. Commun.*, 2019, **10**, 1743.
- 9 H. B. Zhang, P. F. An, W. Zhou, B. Y. Guan, P. Zhang, J. C. Dong and X. W. Lou, *Sci. Adv.*, 2018, **4**, 9.
- 10 H. Li, C. Tsai, A. L. Koh, L. Cai, A. W. Contryman, A. H. Fragapane, J. Zhao, H. S. Han, H. C. Manoharan, F. Abild-Pedersen, J. K. Norskov and X. Zheng, *Nat. Mater.*, 2016, **15**, 364.
- 11 Y. Zhu, G. Chen, X. Xu, G. Yang, M. Liu and Z. Shao, *ACS Catal.*, 2017, **7**, 3540-3547.
- 12 P. Xiong, R. Ma, N. Sakai, L. Nurdiwijayanto and T. Sasaki, *ACS Energy Lett.*, 2018, **3**, 997-1005.
- 13 Z. Zheng, L. Yu, M. Gao, X. Chen, W. Zhou, C. Ma, L. Wu, J. Zhu, X. Meng, J. Hu, Y. Tu, S. Wu, J. Mao, Z. Tian and D. Deng, *Nat. Commun.*, 2020, **11**, 3315.
